# Supplementary material for: The behavioural patterns and neural correlates of concrete and abstract verb processing in aphasia: A novel verb semantic battery
Source: PubMed Central journal article supplement (PMC5883238; doi:10.1016/j.nicl.2017.12.009), 2017-12-06
Supplement: mmc1.pdf [file mmc1.pdf]

### Supplementary Appendix

#### First test: Verb synonym judgment

| Category                  | Probe               | Target         | Distractor 1 | Distractor 2  |
|---------------------------|---------------------|----------------|--------------|---------------|
| Concrete & High Frequency | <b>To boil</b>      | To heat        | To wound     | To comb       |
|                           | <b>To fall</b>      | To drop        | To twist     | To dance      |
|                           | <b>To park</b>      | To place       | To sweep     | To breathe    |
|                           | <b>To murder</b>    | To kill        | To swallow   | To crack      |
|                           | <b>To suck</b>      | To sup         | To break     | To pay        |
|                           | <b>To carve</b>     | To shape       | To spill     | To hunt       |
|                           | <b>To spend</b>     | To pay         | To exercise  | To chase      |
|                           | <b>To add</b>       | To count       | To rise      | To sink       |
|                           | <b>To break</b>     | To crack       | To plant     | To freeze     |
|                           | <b>To rise</b>      | To stand       | To park      | To smile      |
|                           | <b>To spill</b>     | To drop        | To murder    | To telephone  |
|                           | <b>To twist</b>     | To spin        | To add       | To wash       |
|                           | <b>To sweep</b>     | To clean       | To fish      | To heat       |
|                           | <b>To brush</b>     | To comb        | To fall      | To travel     |
|                           | <b>To chase</b>     | To hunt        | To fry       | To brush      |
|                           | <b>To sink</b>      | To submerge    | To embrace   | To place      |
|                           | <b>To freeze</b>    | To chill       | To carve     | To attack     |
|                           | <b>To smile</b>     | To grin        | To boil      | To paint      |
|                           | <b>To wash</b>      | To clean       | To suck      | To enjoy      |
|                           | <b>To telephone</b> | To ring        | To spend     | To wipe       |
| Concrete & Low Frequency  | <b>To bandage</b>   | To plaster     | To vacuum    | To ski        |
|                           | <b>To shoplift</b>  | To pilfer      | To snow      | To soothe     |
|                           | <b>To hike</b>      | To trek        | To snooze    | To cuddle     |
|                           | <b>To skate</b>     | To ski         | To shoplift  | To hover      |
|                           | <b>To ice</b>       | To frost       | To shower    | To glue       |
|                           | <b>To drum</b>      | To strum       | To skate     | To sprint     |
|                           | <b>To butter</b>    | To lubricate   | To mop       | To box        |
|                           | <b>To fence</b>     | To joust       | To iron      | To sunbathe   |
|                           | <b>To glue</b>      | To paste       | To fence     | To holiday    |
|                           | <b>To snooze</b>    | To nap         | To mash      | To microwave  |
|                           | <b>To mash</b>      | To squash      | To ice       | To snowball   |
|                           | <b>To crochet</b>   | To stitch      | To hike      | To toast      |
|                           | <b>To babysit</b>   | To soothe      | To gargle    | To toboggan   |
|                           | <b>To wallpaper</b> | To plaster     | To garden    | To punch      |
|                           | <b>To sprint</b>    | To dash        | To drum      | To uncork     |
|                           | <b>To box</b>       | To punch       | To defrost   | To wallpaper  |
|                           | <b>To sunbathe</b>  | To tan         | To crochet   | To weightlift |
|                           | <b>To microwave</b> | To irradiate   | To bandage   | To jog        |
|                           | <b>To snowball</b>  | To proliferate | To butter    | To saw        |
|                           | <b>To toast</b>     | To scorch      | To babysit   | To parachute  |

| <b>Continued</b>          |                      |                 |                     |                     |
|---------------------------|----------------------|-----------------|---------------------|---------------------|
| <b>Category</b>           | <b>Probe</b>         | <b>Target</b>   | <b>Distractor 1</b> | <b>Distractor 2</b> |
| Abstract & High frequency | <b>To permit</b>     | To enable       | To cost             | To advance          |
|                           | <b>To resolve</b>    | To settle       | To stay             | To suppose          |
|                           | <b>To evolve</b>     | To advance      | To suggest          | To assume           |
|                           | <b>To empathise</b>  | To understand   | To permit           | To benefit          |
|                           | <b>To ban</b>        | To prohibit     | To quote            | To reward           |
|                           | <b>To expect</b>     | To suppose      | To relieve          | To cope             |
|                           | <b>To suggest</b>    | To offer        | To prefer           | To blame            |
|                           | <b>To suppose</b>    | To assume       | To resolve          | To happen           |
|                           | <b>To involve</b>    | To include      | To mean             | To cause            |
|                           | <b>To better</b>     | To improve      | To keep             | To declare          |
|                           | <b>To quote</b>      | To cite         | To involve          | To plan             |
|                           | <b>To define</b>     | To describe     | To expect           | To regard           |
|                           | <b>To relieve</b>    | To calm         | To evolve           | To state            |
|                           | <b>To diminish</b>   | To decrease     | To empathise        | To ease             |
|                           | <b>To benefit</b>    | To reward       | To diminish         | To realise          |
|                           | <b>To cost</b>       | To value        | To define           | To wonder           |
|                           | <b>To cope</b>       | To handle       | To chose            | To decrease         |
| <b>To cause</b>           | To generate          | To believe      | To ban              |                     |
| <b>To blame</b>           | To accuse            | To need         | To better           |                     |
| <b>To state</b>           | To declare           | To accord       | To value            |                     |
| Abstract & Low Frequency  | <b>To implore</b>    | To beseech      | To veto             | To airbrush         |
|                           | <b>To deprive</b>    | To divest       | To sadden           | To toughen          |
|                           | <b>To revere</b>     | To worship      | To subdue           | To rue              |
|                           | <b>To foretell</b>   | To prophesize   | To revere           | To remit            |
|                           | <b>To muse</b>       | To cogitate     | To disallow         | To redeem           |
|                           | <b>To defraud</b>    | To swindle      | To rig              | To proffer          |
|                           | <b>To subdue</b>     | To restrain     | To muse             | To renege           |
|                           | <b>To deviate</b>    | To digress      | To cogitate         | To under-develop    |
|                           | <b>To veto</b>       | To overrule     | To impel            | To remake           |
|                           | <b>To impel</b>      | To coerce       | To hone             | To fault            |
|                           | <b>To disallow</b>   | To prohibit     | To foretell         | To verbalise        |
|                           | <b>To rig</b>        | To equip        | To implore          | To absolve          |
|                           | <b>To partition</b>  | To subdivide    | To revert           | To peruse           |
|                           | <b>To revert</b>     | To regress      | To debase           | To prophesize       |
|                           | <b>To peruse</b>     | To scrutinize   | To collate          | To deprive          |
|                           | <b>To sadden</b>     | To depress      | To lease            | To defraud          |
|                           | <b>To prophesize</b> | To forecast     | To deselect         | To extol            |
| <b>To hone</b>            | To polish            | To deviate      | To infer            |                     |
| <b>To deselect</b>        | To discard           | To cogitate     | To covet            |                     |
| <b>To cogitate</b>        | To ponder            | To misrepresent | To partition        |                     |

**Second tests: Verb picture-to-word matching**

| <b>Target</b>   | <b>Semantic distractor 1</b> | <b>Semantic distractor 2</b> | <b>Unrelated distractor 1</b> | <b>Unrelated distractor 2</b> |
|-----------------|------------------------------|------------------------------|-------------------------------|-------------------------------|
| <b>barking</b>  | roaring                      | growling                     | skating                       | jumping                       |
| <b>begging</b>  | requesting                   | prying                       | snowing                       | ringing                       |
| <b>bending</b>  | crouching                    | squatting                    | raking                        | carrying                      |
| <b>biting</b>   | eating                       | chewing                      | knocking                      | watching                      |
| <b>bleeding</b> | dripping                     | flowing                      | washing                       | skating                       |
| <b>blowing</b>  | puffing                      | sucking                      | driving                       | writing                       |
| <b>bouncing</b> | juggling                     | throwing                     | kissing                       | skiing                        |
| <b>building</b> | plastering                   | creating                     | diving                        | tying                         |
| <b>carrying</b> | taking                       | lifting                      | stopping                      | sinking                       |
| <b>catching</b> | passing                      | throwing                     | kneeling                      | skipping                      |
| <b>climbing</b> | falling                      | jumping                      | biting                        | ironing                       |
| <b>combing</b>  | cutting                      | brushing                     | riding                        | stopping                      |
| <b>cooking</b>  | stirring                     | dining                       | jumping                       | dreaming                      |
| <b>crawling</b> | walking                      | creeping                     | planting                      | melting                       |
| <b>crossing</b> | running                      | driving                      | raining                       | lighting                      |
| <b>crying</b>   | laughing                     | sulking                      | pouring                       | marching                      |
| <b>cutting</b>  | tearing                      | ripping                      | bouncing                      | weaving                       |
| <b>dancing</b>  | holding                      | hugging                      | sleeping                      | washing                       |
| <b>digging</b>  | hammering                    | drilling                     | touching                      | crying                        |
| <b>diving</b>   | swimming                     | sinking                      | running                       | biting                        |
| <b>drawing</b>  | painting                     | colouring                    | pulling                       | bouncing                      |
| <b>dreaming</b> | imagining                    | thinking                     | combing                       | fishing                       |
| <b>drilling</b> | puncturing                   | digging                      | walking                       | shaving                       |
| <b>drinking</b> | eating                       | spitting                     | sewing                        | raking                        |
| <b>dripping</b> | pouring                      | dropping                     | begging                       | smoking                       |
| <b>driving</b>  | riding                       | cycling                      | tickling                      | stroking                      |
| <b>dropping</b> | catching                     | throwing                     | shooting                      | painting                      |
| <b>eating</b>   | drinking                     | crunching                    | climbing                      | drilling                      |
| <b>fishing</b>  | shooting                     | catching                     | lighting                      | singing                       |
| <b>floating</b> | swimming                     | sinking                      | stirring                      | barking                       |
| <b>flying</b>   | floating                     | cruising                     | drilling                      | knocking                      |
| <b>folding</b>  | wrapping                     | tearing                      | licking                       | roaring                       |
| <b>ironing</b>  | hanging                      | drying                       | dropping                      | climbing                      |
| <b>juggling</b> | catching                     | balancing                    | yawning                       | sleeping                      |
| <b>jumping</b>  | climbing                     | skipping                     | floating                      | shooting                      |
| <b>kicking</b>  | scoring                      | throwing                     | rocking                       | pulling                       |
| <b>kissing</b>  | licking                      | loving                       | flying                        | sewing                        |
| <b>kneeling</b> | bending                      | crouching                    | shaving                       | playing                       |
| <b>knitting</b> | weaving                      | sewing                       | crossing                      | laughing                      |
| <b>knocking</b> | ringing                      | tapping                      | watering                      | begging                       |

| <b>Continued</b> |                              |                              |                               |                               |
|------------------|------------------------------|------------------------------|-------------------------------|-------------------------------|
| <b>Target</b>    | <b>Semantic distractor 1</b> | <b>Semantic distractor 2</b> | <b>Unrelated distractor 1</b> | <b>Unrelated distractor 2</b> |
| <b>laughing</b>  | crying                       | smiling                      | ironing                       | knitting                      |
| <b>leaning</b>   | bending                      | standing                     | writing                       | stirring                      |
| <b>licking</b>   | eating                       | drooling                     | tying                         | dripping                      |
| <b>lighting</b>  | extinguishing                | flashing                     | building                      | reading                       |
| <b>marching</b>  | striding                     | fighting                     | melting                       | pointing                      |
| <b>melting</b>   | heating                      | freezing                     | kicking                       | running                       |
| <b>opening</b>   | pulling                      | knocking                     | digging                       | walking                       |
| <b>painting</b>  | drawing                      | colouring                    | dancing                       | rocking                       |
| <b>peeling</b>   | chopping                     | removing                     | weighing                      | skating                       |
| <b>pinching</b>  | gripping                     | poking                       | roaring                       | weighing                      |
| <b>planting</b>  | watering                     | digging                      | knitting                      | sneezing                      |
| <b>playing</b>   | stacking                     | building                     | eating                        | yawning                       |
| <b>pointing</b>  | waving                       | aiming                       | folding                       | kicking                       |
| <b>posting</b>   | giving                       | receiving                    | bending                       | licking                       |
| <b>pouring</b>   | dripping                     | watering                     | sliding                       | blowing                       |
| <b>praying</b>   | requesting                   | worshiping                   | weaving                       | diving                        |
| <b>pulling</b>   | pushing                      | taking                       | watching                      | tickling                      |
| <b>pushing</b>   | sending                      | pulling                      | cutting                       | kissing                       |
| <b>raining</b>   | snowing                      | hailing                      | pointing                      | swinging                      |
| <b>raking</b>    | sweeping                     | hoovering                    | drinking                      | praying                       |
| <b>reading</b>   | writing                      | scanning                     | dripping                      | folding                       |
| <b>riding</b>    | driving                      | jumping                      | typing                        | kneeling                      |
| <b>ringing</b>   | shaking                      | calling                      | sailing                       | flying                        |
| <b>roaring</b>   | barking                      | howling                      | carrying                      | pushing                       |
| <b>rocking</b>   | swinging                     | shaking                      | painting                      | posting                       |
| <b>running</b>   | walking                      | racing                       | juggling                      | cooking                       |
| <b>sailing</b>   | swimming                     | sinking                      | crying                        | crossing                      |
| <b>sewing</b>    | knitting                     | weaving                      | reading                       | touching                      |
| <b>shaving</b>   | cutting                      | washing                      | playing                       | peeling                       |
| <b>shooting</b>  | fishing                      | hitting                      | barking                       | combing                       |
| <b>singing</b>   | talking                      | dancing                      | crawling                      | cutting                       |
| <b>sinking</b>   | swimming                     | falling                      | leaning                       | bending                       |
| <b>sitting</b>   | crouching                    | lying                        | singing                       | planting                      |
| <b>skating</b>   | skiing                       | sliding                      | catching                      | building                      |
| <b>skiing</b>    | sliding                      | skating                      | cooking                       | waving                        |
| <b>skipping</b>  | jumping                      | swinging                     | bleeding                      | drinking                      |
| <b>sleeping</b>  | dreaming                     | waking                       | sinking                       | raining                       |
| <b>sliding</b>   | slipping                     | falling                      | opening                       | typing                        |
| <b>smiling</b>   | laughing                     | pouting                      | fishing                       | opening                       |
| <b>smoking</b>   | lighting                     | coughing                     | marching                      | sliding                       |
| <b>sneezing</b>  | coughing                     | blowing                      | posting                       | snowing                       |

| <b>Continued</b> |                              |                              |                               |                               |
|------------------|------------------------------|------------------------------|-------------------------------|-------------------------------|
| <b>Target</b>    | <b>Semantic distractor 1</b> | <b>Semantic distractor 2</b> | <b>Unrelated distractor 1</b> | <b>Unrelated distractor 2</b> |
| <b>snowing</b>   | raining                      | hailing                      | peeling                       | riding                        |
| <b>stirring</b>  | dining                       | spooning                     | pinching                      | catching                      |
| <b>stopping</b>  | parking                      | blocking                     | dreaming                      | eating                        |
| <b>stroking</b>  | touching                     | poking                       | praying                       | digging                       |
| <b>swimming</b>  | diving                       | snorkelling                  | waving                        | sitting                       |
| <b>swinging</b>  | flying                       | skipping                     | ringing                       | drawing                       |
| <b>tickling</b>  | touching                     | itching                      | pushing                       | watering                      |
| <b>touching</b>  | pinching                     | tapping                      | skipping                      | juggling                      |
| <b>tying</b>     | opening                      | stitching                    | swimming                      | pouring                       |
| <b>typing</b>    | writing                      | pressing                     | skiing                        | leaning                       |
| <b>walking</b>   | marching                     | running                      | stroking                      | smiling                       |
| <b>washing</b>   | watering                     | wiping                       | swinging                      | crawling                      |
| <b>watching</b>  | listening                    | observing                    | drawing                       | floating                      |
| <b>watering</b>  | sowing                       | spilling                     | blowing                       | dancing                       |
| <b>waving</b>    | pointing                     | saluting                     | smiling                       | driving                       |
| <b>weaving</b>   | knitting                     | sewing                       | laughing                      | swimming                      |
| <b>weighing</b>  | dividing                     | measuring                    | smoking                       | pinching                      |
| <b>writing</b>   | typing                       | drawing                      | sneezing                      | bleeding                      |
| <b>yawning</b>   | sleeping                     | coughing                     | sitting                       | dropping                      |

**Please cite the paper when using the tests above. Thank you.**
